# Supplementary material for: Isolation, Characterization, and Comparative Genomic Analysis of Bacteriophage Ec_MI-02 from Pigeon Feces Infecting Escherichia coli O157:H7
Source: MDPI journal article supplement (doi:10.3390/ijms24119506), 2023-05-30
Supplement: s1 [file s1]

# Isolation, Characterization, and Comparative Genomic Analysis of Bacteriophage Ec\_MI-02 from Pigeon Feces Infecting *Escherichia coli* O157:H7

Mohamad Ismail Sultan-Alolama <sup>1,2</sup>, Amr Amin <sup>2</sup>, Ranjit Vijayan <sup>2,3,4,\*</sup> and Khaled A. El-Tarabily <sup>2,5,6,\*</sup>

<sup>1</sup> Zayed Complex for Herbal Research and Traditional Medicine, Research and Innovation Center, Department of Health, Abu Dhabi 5674, United Arab Emirates

<sup>2</sup> Department of Biology, College of Science, United Arab Emirates University, Al Ain P.O. Box 15551, United Arab Emirates

<sup>3</sup> The Big Data Analytics Center, United Arab Emirates University, Al Ain P.O. Box 15551, United Arab Emirates

<sup>4</sup> Zayed Center for Health Sciences, United Arab Emirates University, Al Ain P.O. Box 17666, United Arab Emirates

<sup>5</sup> Khalifa Center for Genetic Engineering and Biotechnology, United Arab Emirates University, Al Ain P.O. Box 15551, United Arab Emirates

<sup>6</sup> Harry Butler Institute, Murdoch University, Murdoch, WA 6150, Australia

\* Correspondence: ranjit.v@uaeu.ac.ae (R.V.); ktarabily@uaeu.ac.ae (K.A.E.-T.)

## SUPPLEMENTARY INFORMATION

**Table S1:** Host range of the two bacteriophages Ec\_MI-02 and UAE\_MI-01 isolated from pigeon feces against different gram-positive and gram-negative bacteria.

| Bacterial strains                                                                                                                                                                                                                                                                                                                                                         | Bacteriophage Ec_MI-02 (current study) | Bacteriophage UAE_MI-01 (Sultan-Alolama et al., 2022) [62] |
|---------------------------------------------------------------------------------------------------------------------------------------------------------------------------------------------------------------------------------------------------------------------------------------------------------------------------------------------------------------------------|----------------------------------------|------------------------------------------------------------|
| <i>Escherichia coli</i> O157:H7 NCTC 12900                                                                                                                                                                                                                                                                                                                                | ++                                     | ++                                                         |
| <i>Escherichia coli</i> ATCC 25922                                                                                                                                                                                                                                                                                                                                        | –                                      | –                                                          |
| <i>Escherichia coli</i> ATCC 8739                                                                                                                                                                                                                                                                                                                                         | ++                                     | ++                                                         |
| <i>Escherichia coli</i> ATCC 35218                                                                                                                                                                                                                                                                                                                                        | +                                      | –                                                          |
| <i>Escherichia coli</i> ATCC 15223                                                                                                                                                                                                                                                                                                                                        | +                                      | ++                                                         |
| <i>Escherichia coli</i> ATCC 23227                                                                                                                                                                                                                                                                                                                                        | +                                      | –                                                          |
| <i>Escherichia coli</i> ATCC 9637                                                                                                                                                                                                                                                                                                                                         | +                                      | –                                                          |
| <i>Escherichia coli</i> ATCC 23224                                                                                                                                                                                                                                                                                                                                        | +                                      | –                                                          |
| <i>Escherichia coli</i> (patient isolate-urine)                                                                                                                                                                                                                                                                                                                           | +                                      | –                                                          |
| <i>Escherichia coli</i> ESBL-producing (patient isolate-blood)                                                                                                                                                                                                                                                                                                            | –                                      | –                                                          |
| <i>Bacillus subtilis</i> ATCC 6051                                                                                                                                                                                                                                                                                                                                        | –                                      | –                                                          |
| <i>Pseudomonas aeruginosa</i> ATCC 25668                                                                                                                                                                                                                                                                                                                                  | –                                      | –                                                          |
| <i>Pseudomonas aeruginosa</i> ATCC 27853                                                                                                                                                                                                                                                                                                                                  | –                                      | –                                                          |
| Methicillin-resistant <i>Staphylococcus aureus</i> (patient isolate)                                                                                                                                                                                                                                                                                                      | –                                      | –                                                          |
| <i>Staphylococcus aureus</i> ATCC 6358                                                                                                                                                                                                                                                                                                                                    | –                                      | –                                                          |
| <i>Staphylococcus aureus</i> ATCC 29213                                                                                                                                                                                                                                                                                                                                   | –                                      | –                                                          |
| <i>Staphylococcus epidermidis</i> ATCC 12228                                                                                                                                                                                                                                                                                                                              | –                                      | –                                                          |
| <i>Staphylococcus saprophyticus</i> ATCC-BAA 750                                                                                                                                                                                                                                                                                                                          | –                                      | –                                                          |
| <i>Streptococcus pyogenes</i> ATCC 19615                                                                                                                                                                                                                                                                                                                                  | –                                      | –                                                          |
| <i>Enterococcus faecalis</i> ATCC 51299                                                                                                                                                                                                                                                                                                                                   | –                                      | –                                                          |
| <i>Enterococcus faecalis</i> (Patient isolate)                                                                                                                                                                                                                                                                                                                            | –                                      | –                                                          |
| <i>Enterococcus casseliflavus</i> (Patient isolate)                                                                                                                                                                                                                                                                                                                       | –                                      | –                                                          |
| <i>Enterobacter aerogenes</i> ATCC 13018                                                                                                                                                                                                                                                                                                                                  | –                                      | –                                                          |
| <i>Enterobacter hormaechei</i> (patient isolate)                                                                                                                                                                                                                                                                                                                          | –                                      | –                                                          |
| <i>Klebsiella pneumonia</i> ESBL-producing ATCC 700603                                                                                                                                                                                                                                                                                                                    | –                                      | –                                                          |
| <i>Klebsiella pneumonia</i> KPC 2 +ve (patient isolate)                                                                                                                                                                                                                                                                                                                   | –                                      | –                                                          |
| <i>Haemophilus influenzae</i> ATCC 9007                                                                                                                                                                                                                                                                                                                                   | –                                      | –                                                          |
| <i>Stenotrophomonas maltophilia</i> ATCC 17666                                                                                                                                                                                                                                                                                                                            | –                                      | –                                                          |
| <i>Salmonella enterica</i> ATCC 14028                                                                                                                                                                                                                                                                                                                                     | –                                      | –                                                          |
| <i>Salmonella</i> sp. (patient isolate)                                                                                                                                                                                                                                                                                                                                   | –                                      | –                                                          |
| <i>Proteus vulgaris</i> ATCC 29905                                                                                                                                                                                                                                                                                                                                        | –                                      | –                                                          |
| <i>Mycobacterium smegmatis</i> ATCC 607                                                                                                                                                                                                                                                                                                                                   | –                                      | –                                                          |
| NCTC: national collection of type cultures; ATCC: American type culture collection; ESBL: extended-spectrum beta-lactamase. (++) = host species susceptible to phage lysis with clear plaque, (+) = host species susceptible to phage lysis with turbid plaque, and (–) indicates no plaque. <i>Escherichia coli</i> O157:H7 NCTC 12900 was used as the propagation host. |                                        |                                                            |

**Table S2:** Effect of different pH values on the viability of the two bacteriophages Ec\_MI-02 and UAE\_MI-01 isolated from pigeon feces.

| pH Value                                                                                                                                                                                                                                                                                                                                                                                                                                                                                                                                                     | Log <sub>10</sub> pfu/mL of bacteriophage Ec_MI-02 (current study) | Log <sub>10</sub> pfu/mL of bacteriophage UAE_MI-01 (Sultan-Alolama et al., 2022) [62] |
|--------------------------------------------------------------------------------------------------------------------------------------------------------------------------------------------------------------------------------------------------------------------------------------------------------------------------------------------------------------------------------------------------------------------------------------------------------------------------------------------------------------------------------------------------------------|--------------------------------------------------------------------|----------------------------------------------------------------------------------------|
| 3                                                                                                                                                                                                                                                                                                                                                                                                                                                                                                                                                            | 5.93 ± 0.048 aA                                                    | 0.00 ± 0.00 aB                                                                         |
| 4                                                                                                                                                                                                                                                                                                                                                                                                                                                                                                                                                            | 5.96 ± 0.047 aA                                                    | 5.72 ± 0.12 bB                                                                         |
| 7                                                                                                                                                                                                                                                                                                                                                                                                                                                                                                                                                            | 5.91 ± 0.10 aA                                                     | 7.79 ± 0.11 cB                                                                         |
| 9                                                                                                                                                                                                                                                                                                                                                                                                                                                                                                                                                            | 5.89 ± 0.10 aA                                                     | 7.76 ± 0.15 cB                                                                         |
| 10                                                                                                                                                                                                                                                                                                                                                                                                                                                                                                                                                           | 5.92 ± 0.13 aA                                                     | 7.78 ± 0.16 cB                                                                         |
| <p>Values of the number of phages (log<sub>10</sub> pfu/mL) are means of four independent replicates ± standard deviation. Values with the same lower-case letters are not significantly (<math>p &gt; 0.05</math>) different within columns according to Fisher's Protected LSD Test. Values with the same upper-case letters are not significantly (<math>p &gt; 0.05</math>) different within rows according to Fisher's Protected LSD Test. pfu = plaque forming units. <i>Escherichia coli</i> O157:H7 NCTC 12900 was used as the propagation host.</p> |                                                                    |                                                                                        |

**Table S3:** Effect of different temperatures on the viability of the two bacteriophages Ec\_MI-02 and UAE\_MI-01 isolated from pigeon feces.

| Temperature                                                                                                                                                                                                                                                                                                                                                                                                                                                                                                                                                  | Log <sub>10</sub> pfu/mL of bacteriophage Ec_MI-02 (current study) | Log <sub>10</sub> pfu/mL of bacteriophage UAE_MI-01 (Sultan-Alolama et al., 2022) [62] |
|--------------------------------------------------------------------------------------------------------------------------------------------------------------------------------------------------------------------------------------------------------------------------------------------------------------------------------------------------------------------------------------------------------------------------------------------------------------------------------------------------------------------------------------------------------------|--------------------------------------------------------------------|----------------------------------------------------------------------------------------|
| 25 °C for 15 minutes                                                                                                                                                                                                                                                                                                                                                                                                                                                                                                                                         | 5.75 ± 0.078 aA                                                    | 7.46 ± 0.13 aB                                                                         |
| 25 °C for 30 minutes                                                                                                                                                                                                                                                                                                                                                                                                                                                                                                                                         | 5.61 ± 0.055 aB                                                    | 7.42 ± 0.15 aB                                                                         |
| 45 °C for 15 minutes                                                                                                                                                                                                                                                                                                                                                                                                                                                                                                                                         | 5.46 ± 0.055 bA                                                    | 7.49 ± 0.14 aB                                                                         |
| 45 °C for 30 minutes                                                                                                                                                                                                                                                                                                                                                                                                                                                                                                                                         | 5.43 ± 0.032 bA                                                    | 7.48 ± 0.21 aB                                                                         |
| 55 °C for 15 minutes                                                                                                                                                                                                                                                                                                                                                                                                                                                                                                                                         | 5.23 ± 0.087 cA                                                    | 7.43 ± 0.18 aB                                                                         |
| 55 °C for 30 minutes                                                                                                                                                                                                                                                                                                                                                                                                                                                                                                                                         | 5.19 ± 0.114 cA                                                    | 7.46 ± 0.12 aB                                                                         |
| 65 °C for 15 minutes                                                                                                                                                                                                                                                                                                                                                                                                                                                                                                                                         | 4.91 ± 0.080 dA                                                    | 7.47 ± 0.19 aB                                                                         |
| 65 °C for 30 minutes                                                                                                                                                                                                                                                                                                                                                                                                                                                                                                                                         | 4.85 ± 0.067 dA                                                    | 7.43 ± 0.26 aB                                                                         |
| 75 °C for 15 minutes                                                                                                                                                                                                                                                                                                                                                                                                                                                                                                                                         | 0.00 ± 0.00 eA                                                     | 3.29 ± 0.09 bB                                                                         |
| 75 °C for 30 minutes                                                                                                                                                                                                                                                                                                                                                                                                                                                                                                                                         | 0.00 ± 0.00 eA                                                     | 0.00 ± 0.00 bA                                                                         |
| 100 °C for 15 minutes                                                                                                                                                                                                                                                                                                                                                                                                                                                                                                                                        | 0.00 ± 0.00 eA                                                     | 0.00 ± 0.00 cA                                                                         |
| 100 °C for 30 minutes                                                                                                                                                                                                                                                                                                                                                                                                                                                                                                                                        | 0.00 ± 0.00 eA                                                     | 0.00 ± 0.00 bA                                                                         |
| <p>Values of the number of phages (log<sub>10</sub> pfu/mL) are means of four independent replicates ± standard deviation. Values with the same lower-case letters are not significantly (<math>p &gt; 0.05</math>) different within columns according to Fisher's Protected LSD Test. Values with the same upper-case letters are not significantly (<math>p &gt; 0.05</math>) different within rows according to Fisher's Protected LSD Test. pfu = plaque forming units. <i>Escherichia coli</i> O157:H7 NCTC 12900 was used as the propagation host.</p> |                                                                    |                                                                                        |

**Table S4:** Effect of different common laboratory disinfectants on the viability of the two bacteriophages Ec\_MI-02 and UAE\_MI-01 isolated from pigeon feces.

| Disinfectant                                                                                                                                                                                                                                                                                                                                                                                                                                                                                                                   | (log <sub>10</sub> pfu/mL) of<br>bacteriophage<br>Ec_MI-02 (current<br>study) | (log <sub>10</sub> pfu/mL) of<br>bacteriophage<br>UAE_MI-01 (Sultan-Alolama<br>et al., 2022) [62] |
|--------------------------------------------------------------------------------------------------------------------------------------------------------------------------------------------------------------------------------------------------------------------------------------------------------------------------------------------------------------------------------------------------------------------------------------------------------------------------------------------------------------------------------|-------------------------------------------------------------------------------|---------------------------------------------------------------------------------------------------|
| Ethanol 70% Initial Titer                                                                                                                                                                                                                                                                                                                                                                                                                                                                                                      | 6.19 ± 0.028 aA                                                               | 7.48 ± 0.11 aB                                                                                    |
| Ethanol 70% After 2 min                                                                                                                                                                                                                                                                                                                                                                                                                                                                                                        | 5.91 ± 0.155 bA                                                               | 6.62 ± 0.06 bB                                                                                    |
| Sodium hypochlorite 2%<br>Initial Titer                                                                                                                                                                                                                                                                                                                                                                                                                                                                                        | 6.18 ± 0.075 aA                                                               | 7.51 ± 0.15 aB                                                                                    |
| Sodium hypochlorite 2% After<br>2 min                                                                                                                                                                                                                                                                                                                                                                                                                                                                                          | 0.00% ± 0.00 cA                                                               | 6.09 ± 0.10 cB                                                                                    |
| Commercial disinfectant 20%<br>Initial Titer                                                                                                                                                                                                                                                                                                                                                                                                                                                                                   | 6.20 ± 0.057 aA                                                               | 7.45 ± 0.10 aB                                                                                    |
| Commercial disinfectant 20%<br>After 2 min                                                                                                                                                                                                                                                                                                                                                                                                                                                                                     | 3.14 ± 0.240 dA                                                               | 7.09 ± 0.06 dB                                                                                    |
| Values of the number of phages (log <sub>10</sub> pfu/mL) are means of four independent replicates ± standard deviation. Values with the same lower-case letters are not significantly ( $p > 0.05$ ) different within columns according to Fisher's Protected LSD Test. Values with the same upper-case letters are not significantly ( $p > 0.05$ ) different within rows according to Fisher's Protected LSD Test. pfu = plaque forming units. <i>Escherichia coli</i> O157:H7 NCTC 12900 was used as the propagation host. |                                                                               |                                                                                                   |

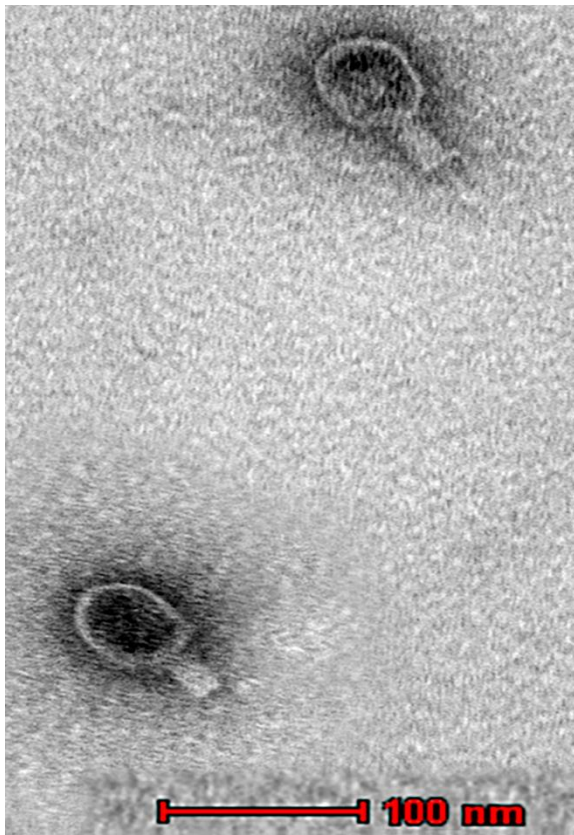

Ec\_MI-02

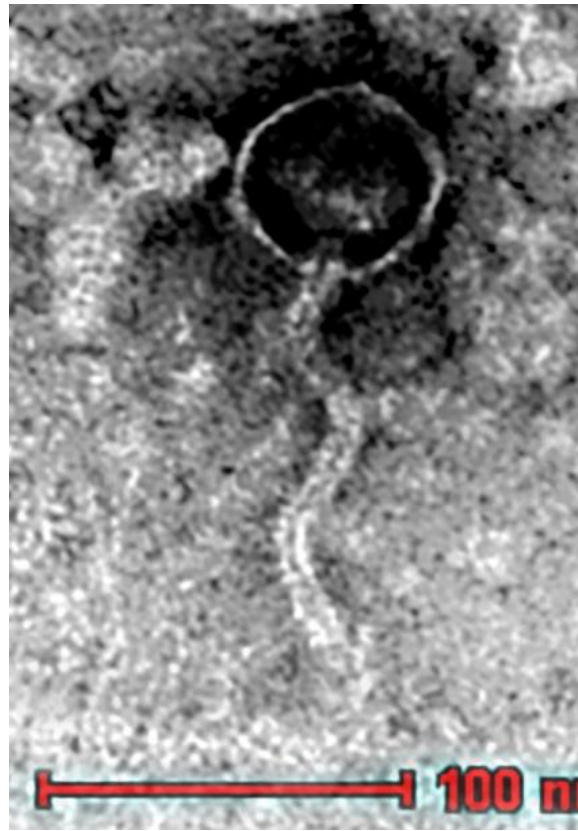

UAE\_MI-01

**Figure S1.** Transmission electron micrograph of the two bacteriophages, Ec\_MI-02 (current study, left) and UAE\_MI-01 (Sultan-Alolama et al., 2022) [62], right) isolated from pigeon feces Scale bar = 100 nm.

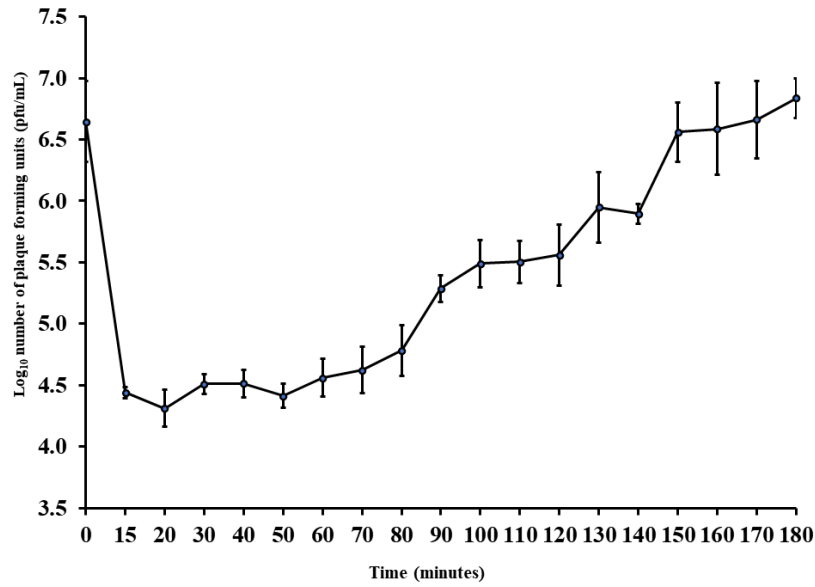

**Ec\_MI-02**

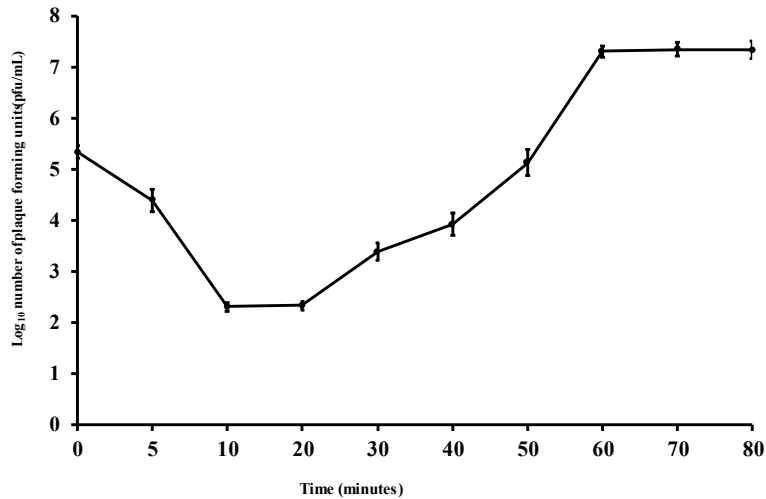

**UAE\_MI-01**

**Figure S2.** One-step growth curve of the two bacteriophages, Ec\_MI-02 (current study, top) and UAE\_MI-01 (Sultan-Alolama et al., 2022) [62], bottom) isolated from pigeon feces with *Escherichia coli* O157:H7 NCTC 12900 as the propagation host. Values are means  $\pm$  standard deviation of four replicates for each timing. Bars represent standard deviation. pfu = plaque forming units.

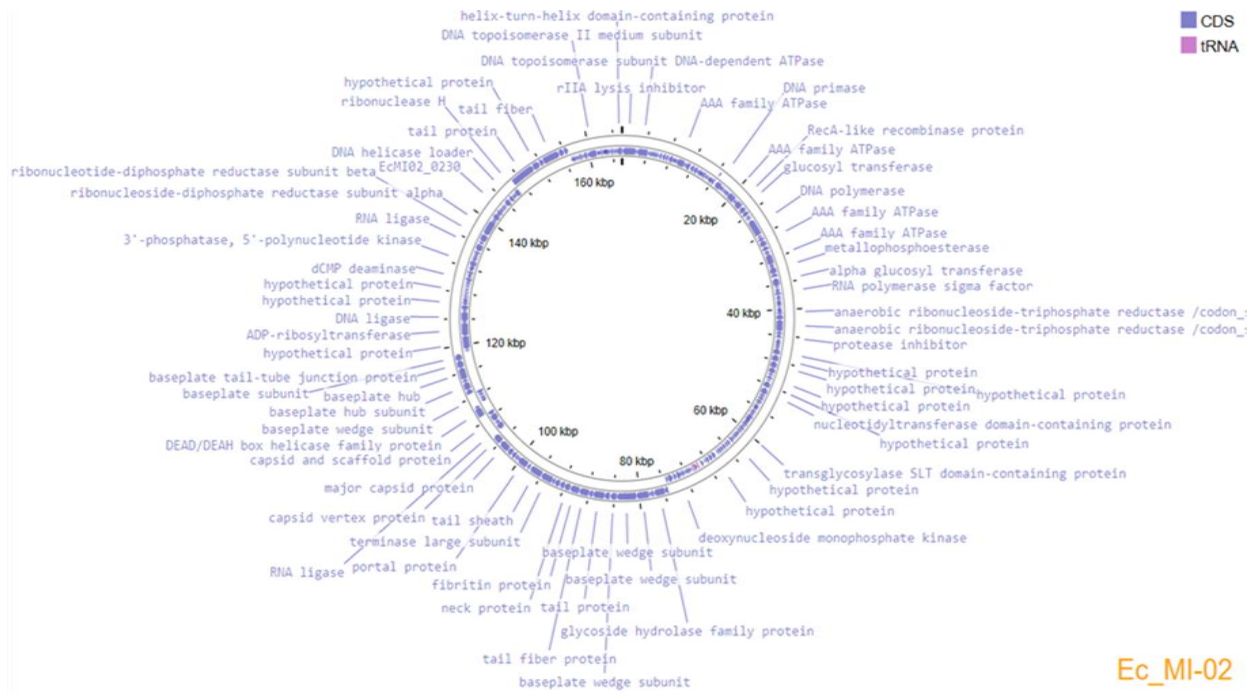

Ec\_MI-02

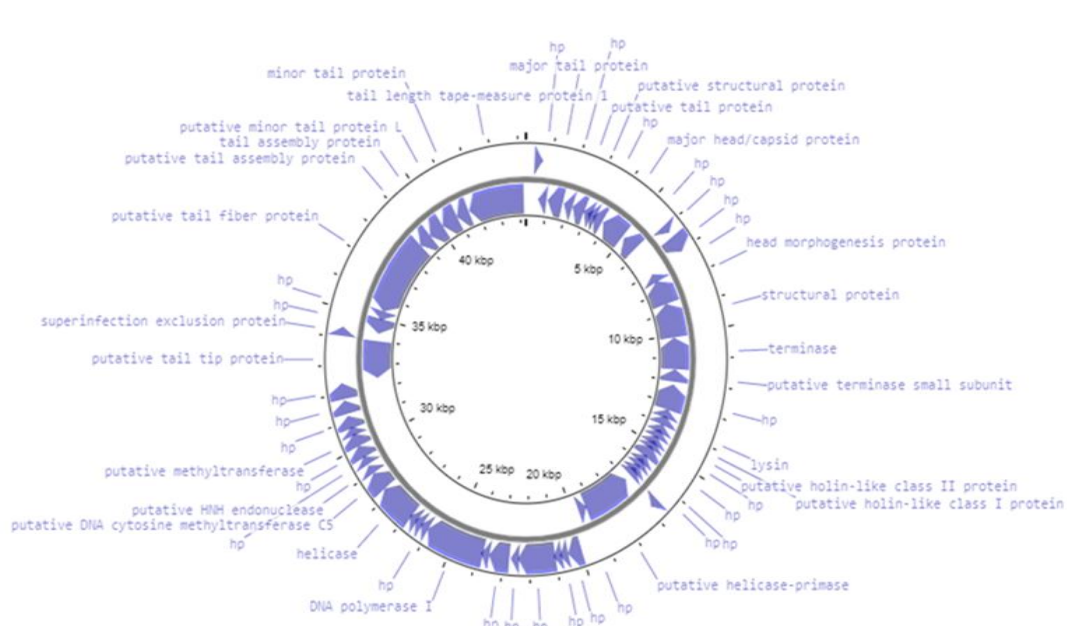

Escherichia phage UAE\_MI-01, complete genome.

**Figure S3.** Genome organization map of the two bacteriophages, Ec\_MI-02 (current study, top) and UAE\_MI-01 (Sultan-Alolama et al., 2022) [62], bottom) isolated from pigeon's feces with *Escherichia coli* O157:H7 NCTC 12900 as the propagation host.



## Reference

62. Sultan-Alolama, M.I.; Amin, A.; El-Tarabily, K.A.; Vijayan, R. Characterization and genomic analysis of *Escherichia coli* O157:H7 phage UAE\_MI-01 isolated from birds. *Int. J. Mol. Sci.* **2022**, *23*, 14846. doi:10.3390/ijms232314846
